# Supplementary material for: Synthesis and optoelectronic properties of a promising quaternary metal oxide light absorber CuBiW2O8
Source: Royal Society of Chemistry journal article supplement (doi:10.1039/d0ta07653h), 2020-12-14
Supplement: d0ta07653h1.pdf [file d0ta07653h1.pdf]

**Supporting Information for:**

**Synthesis of Promising Metal Oxide Light Absorber CuBiW<sub>2</sub>O<sub>8</sub> (CBTO) by  
Cu-Rich Solid State Method and Measurement of Optoelectronic Properties**

Lite Zhou<sup>†,1,2</sup>, Edan Bainglass<sup>†,3</sup>, Maryam Masroor<sup>1,2</sup>, Binod Giri<sup>1,2</sup>, Guangjiang Li<sup>4</sup>, Alexander Carl<sup>5</sup>, Ronald L. Grimm<sup>5</sup>, Muhammad N. Huda<sup>3</sup>, Lyubov V Titova<sup>4</sup>, and Pratap M. Rao<sup>1,2\*</sup>

<sup>†</sup>Equal contributions

<sup>1</sup>Department of Mechanical Engineering, Worcester Polytechnic Institute, Worcester,  
Massachusetts, 01609, United States

<sup>2</sup>Materials Science and Engineering Graduate Program, Worcester Polytechnic Institute,  
Worcester, Massachusetts, 01609, United States

<sup>3</sup>Department of Physics, University of Texas at Arlington, Arlington Texas, 76019, United States

<sup>4</sup>Department of Physics, Worcester Polytechnic Institute, Worcester, Massachusetts, 01609,  
United States

<sup>5</sup>Department of Chemistry and Biochemistry, Worcester Polytechnic Institute, Worcester,  
Massachusetts, 01609, United States

## **Methods of Theoretical Calculations**

Ground state energy calculations were carried out in the Vienna *ab initio* Simulation package (VASP 5.4.4)<sup>1, 2</sup> using the generalized gradient approximation as parameterized by Perdew-Burke-Ernzerhof (GGA-PBE)<sup>3, 4</sup> to handle the exchange and correlation potential of the Kohn-Sham equations of DFT<sup>5</sup>. Core electrons were treated within the frozen-core projector augmented-wave (PAW) framework<sup>6, 7</sup>, while valence electrons were expanded in a plane wave basis set with a kinetic energy cutoff of 600 eV. Integrations in the Brillouin zone (BZ) were performed without symmetry considerations using the 2<sup>nd</sup> order Methfessel-Paxton method<sup>8</sup> on Monkhorst-Pack<sup>9</sup> k-point meshes derived from lattice shapes and sizes. Energy cutoff and k-point mesh values were converged within a total energy of 1 meV for all compound. As was done in the original theoretical work on CBTO<sup>10</sup>, a Hubbard-U<sup>11-13</sup> on-site Coulomb potential of  $U_{\text{eff}} = 6$  eV was applied to Cu 3d to correct the underestimation of d-electron localization by DFT<sup>11, 14, 15</sup>. The same was applied to all Cu-containing fragments.

The single-phase region of a chemical potential landscape is obtained by solving a system of inequalities reflecting enthalpic conditions for the primary compound and any of its possible secondary phases,

$$\sum_{\alpha} n_{\alpha} \Delta\mu_{\alpha} = \Delta H_{f,p} \quad (S1a)$$

$$\sum_{\beta} n_{\beta} \Delta\mu_{\beta} < \Delta H_{f,s} \quad (S1b)$$

as functions of chemical potentials of species constituting the primary phase<sup>16</sup>. In the above equations,  $n_{\alpha,\beta}$  and  $\Delta\mu_{\alpha,\beta}$  respectively represent the fractions of each species in the formula unit and its chemical potential bounded by

$$\Delta H_f \leq n_{\alpha,\beta} \Delta\mu_{\alpha,\beta} \leq 0 \quad (S2)$$

$\Delta H_f$  is the calculated formation enthalpy of the primary/secondary phase derived from  $E_{\text{solid}}$ , the total ground state energy of the compound,

$$\Delta H_f = E_{\text{solid}} - \sum_{\alpha} n_{\alpha} E_{\alpha}^{\text{bulk}} \quad (S3)$$

where  $E_{\alpha}^{\text{bulk}}$  is the ground state energy of  $\alpha$  in its standard elemental phase. For CBTO, the process involves the following system of inequalities:

$$\mu_{Cu} + \mu_{Bi} + 2\mu_W + 4\mu_{O_2} = \Delta H_{f,CBTO} = -21.386 \text{ eV} \quad (S4a)$$

$$\mu_{Cu} + \mu_{O_2} < \Delta_{f,CuO} = -1.590 \text{ eV} \quad (S4b)$$

$$2\mu_{Cu} + \frac{1}{2}\mu_{O_2} < \Delta_{f,Cu_2O} = -1.602 \text{ eV} \quad (S4c)$$

$$2\mu_{Bi} + \frac{3}{2}\mu_{O_2} < \Delta_{f,Bi_2O_3} = -6.242 \text{ eV} \quad (S4d)$$

$$\mu_W + \frac{3}{2}\mu_{O_2} < \Delta_{f,W_2O_3} = -8.588 \text{ eV} \quad (S4e)$$

$$\mu_{Cu} + \mu_W + 2\mu_{O_2} < \Delta_{f,CuWO_4} = -10.253 \text{ eV} \quad (S4f)$$

$$2\mu_{Cu} + \mu_W + 2\mu_{O_2} < \Delta_{f,Cu_2WO_4} = -10.013 \text{ eV} \quad (S4g)$$

$$2\mu_{Bi} + \mu_W + 3\mu_{O_2} < \Delta_{f,Bi_2WO_6} = -15.547 \text{ eV} \quad (S4h)$$

Solutions to the above equations with Cu taken as a free variable are shown in Figure 2 of the main text. Similar analyses for Bi and W are shown here in Figure S1a and S1b, respectively. Defect formation enthalpies are given by

$$\Delta H_\delta = E_\delta - E_p + \sum_\alpha m_\alpha \mu_\alpha \quad (S6a)$$

$$\mu_\alpha = \mu_\alpha^0 + \Delta\mu_\alpha \quad (S6b)$$

where  $E_\delta$  and  $E_p$  are the total ground state energies of the primary compound with and without the defect, respectively. By convention,  $m_\alpha = -1$  corresponds to the addition of one  $\alpha$  atom to the system.  $\mu_\alpha^0$  is a reference chemical potential from the standard elemental phase of  $\alpha$ .  $\Delta\mu_\alpha$  determines the chemical environment by representing the additional energy required to get  $\alpha$  from a source during synthesis, with  $\Delta\mu_\alpha = 0$  reflecting  $\alpha$ -rich conditions.  $\Delta\mu_\alpha$  is bounded according to eq. S2.

The frequency dependent absorption coefficient  $\alpha(\omega)$  is derived from the extinction coefficient  $k(\omega)$  as follows<sup>17</sup>:

$$\alpha_{ii}(\omega) = \frac{2\omega}{c} k_{ii}(\omega) \quad (S7a)$$

$$k_{ii}(\omega) = \left\{ \frac{1}{2} \left[ \left( \text{Re } \varepsilon_{ii}(\omega) \right)^2 + \left( \text{Im } \varepsilon_{ii}(\omega) \right)^2 \right]^{1/2} - \text{Re } \varepsilon_{ii}(\omega) \right\}^{1/2} \quad (S7b)$$

where  $c$  is the speed of light, and the real and imaginary parts of  $\varepsilon(\omega)$ , the dielectric tensor, are calculated from the following<sup>18</sup>:

$$\text{Im } \varepsilon_{ij}(\omega) = \frac{4\pi^2 e^2}{\Omega} \lim_{q \rightarrow 0} \frac{1}{q^2} \sum_{c,v,k} 2w_k \delta(\varepsilon_{ck} - \varepsilon_{vk} - \omega) \times \langle u_{ck+e_{iq}} | u_{ck} \rangle \langle u_{ck+e_{jq}} | u_{ck} \rangle \quad (S8a)$$

$$\text{Re } \varepsilon_{ij}(\omega) = 1 + \frac{2}{\pi} P \int_0^\infty \frac{\text{Im } \varepsilon_{ij}(\omega') \omega'}{\omega'^2 - \omega^2 + i\eta} d\omega' \quad (\text{S8b})$$

where  $\Omega$  is the volume of the primitive cell,  $q$  the Bloch wave vector of the incident wave,  $c$  and  $v$  the conduction and valence states,  $\mathbf{k}$  the Bloch wave vector used to expand the Kohn-Sham solutions, and  $w_{\mathbf{k}}$  the  $k$ -point weights. The Dirac delta function ensures energy conservation. Equation S8b is the Kramers-Kronig dispersion relation.

We aligned the band edges of CBTO and  $\text{Bi}_2\text{WO}_6$  by referencing their respective VBM and CBM Kohn-Sham eigenvalues to the average of their oxygen 1s core states. Results suggest that CBTO Cu 3d – O 2p hybridized states will dominate the VBM at the interface (Figure S2). This is likely due to the higher energies of Cu 3d electrons with respect to Bi 6s – O 2p hybridized orbitals at the top of the valence bands.

### **Supporting Experimental and Theoretical Results**

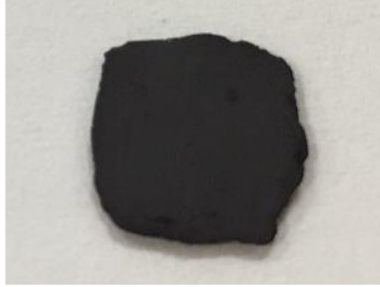

**Figure S1.** Optical image of pellet formed by starting with powders that had been annealed 4 times in Cu rich atmosphere, pressing these into a Cu box, and annealing again in a tube furnace at 600 °C for 9 hours with 500 sccm flow rate of argon to obtain a dense sintered pellet.

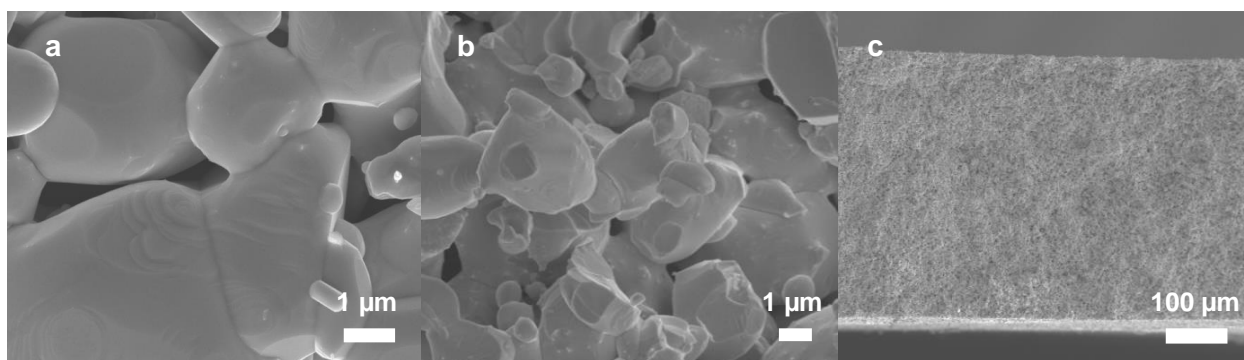

**Figure S2.** Scanning electron microscopy (SEM) of the pellet from Figure S1 - top (a and b) and cross-section (c) images.

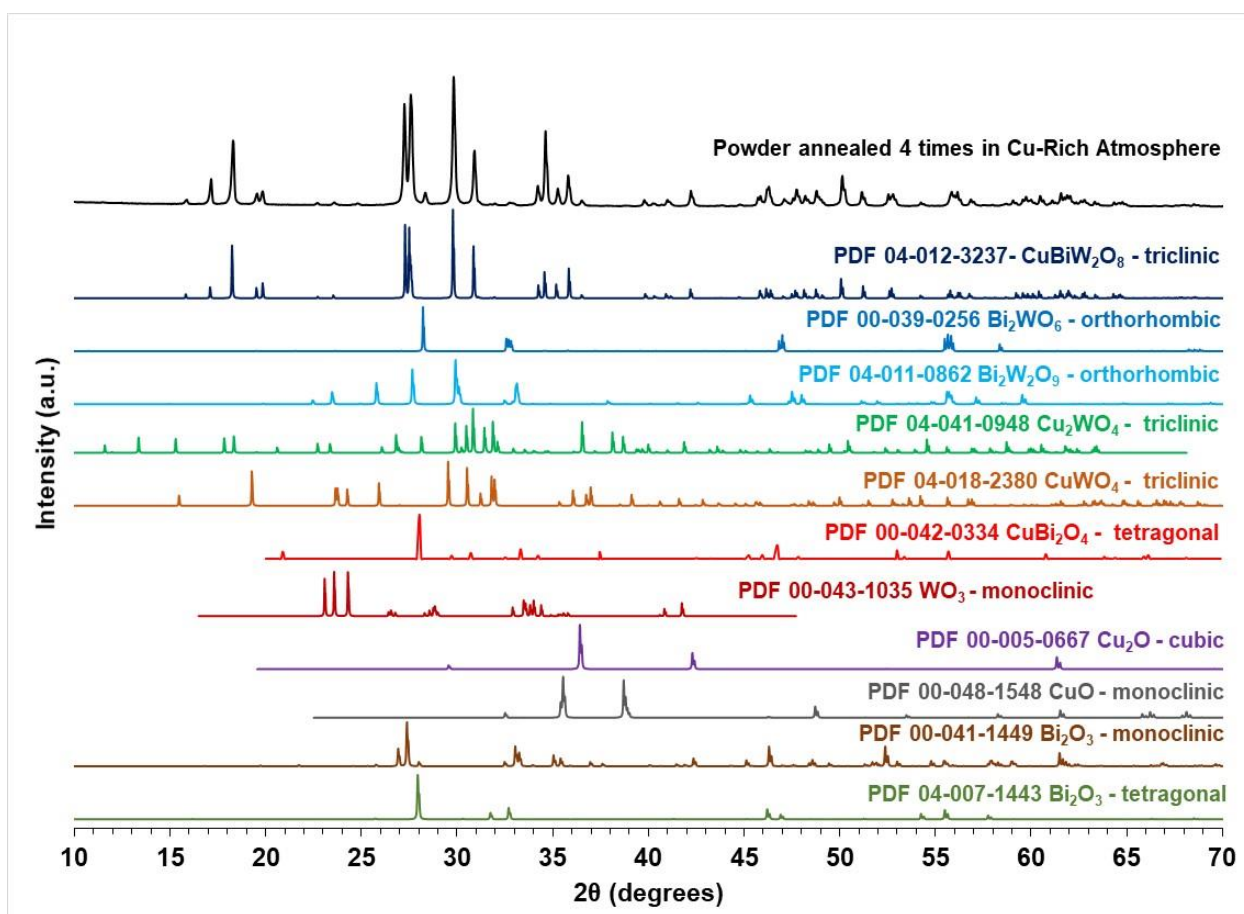

**Figure S3.** Measured XRD pattern of the powders annealed 4 times in Cu rich atmosphere, and powder diffraction file (PDF) standard patterns of all the phases considered in the XRD analysis (CuBiW<sub>2</sub>O<sub>8</sub> - triclinic, Bi<sub>2</sub>WO<sub>6</sub> - orthorhombic, Bi<sub>2</sub>W<sub>2</sub>O<sub>9</sub> – orthorhombic, Cu<sub>2</sub>WO<sub>4</sub> – triclinic, CuWO<sub>4</sub> - triclinic, CuBi<sub>2</sub>O<sub>4</sub> - tetragonal, WO<sub>3</sub> - monoclinic, Cu<sub>2</sub>O - cubic, CuO - monoclinic, Bi<sub>2</sub>O<sub>3</sub> - monoclinic, and Bi<sub>2</sub>O<sub>3</sub> - tetragonal).

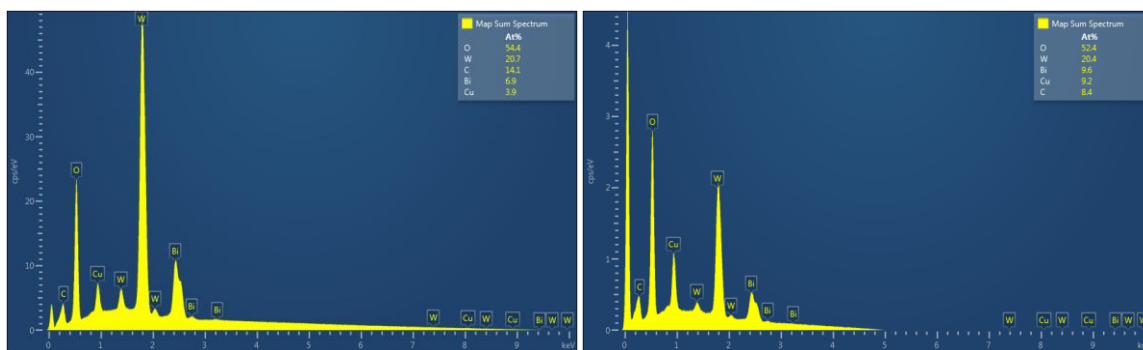

**Figure S4.** SEM - energy dispersive X-ray spectroscopy (EDS) of powders annealed in Ar without Cu-rich atmosphere (left) and with Cu-rich atmosphere (right).

|                                           | Cu   | Bi   | W    | O    | C    | Total |
|-------------------------------------------|------|------|------|------|------|-------|
| Stoichiometric $\text{CuBiW}_2\text{O}_8$ | 8.3  | 8.3  | 16.7 | 66.7 | 0.0  | 100.0 |
| Annealed w/o Cu-rich atm                  | 3.9  | 6.9  | 20.7 | 54.4 | 14.1 | 100.0 |
| Annealed w/ Cu-rich atm                   | 9.2  | 9.6  | 20.4 | 52.4 | 8.4  | 100.0 |
| Annealed w/o Cu-rich atm excl. C          | 4.5  | 8.0  | 24.1 | 63.3 | 0.0  | 100.0 |
| Annealed w/ Cu-rich atm excl. C           | 10.0 | 10.5 | 22.3 | 57.2 | 0.0  | 100.0 |

**Table S1.** EDS comparison of atomic percentage of powders annealed with and without Cu-rich atmosphere.

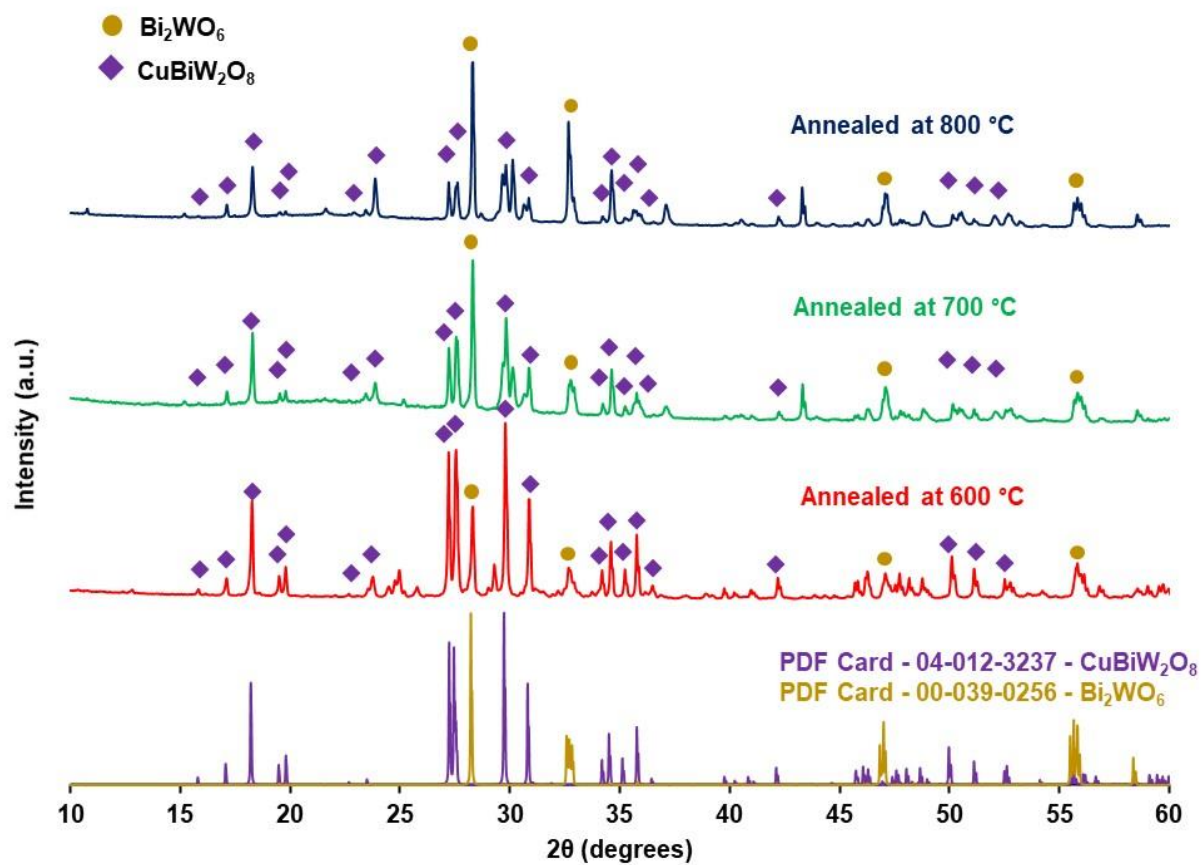

**Figure S5.** XRD patterns of powders annealed 1 time in Cu-rich atmosphere at temperatures of 600, 700 and 800 °C.

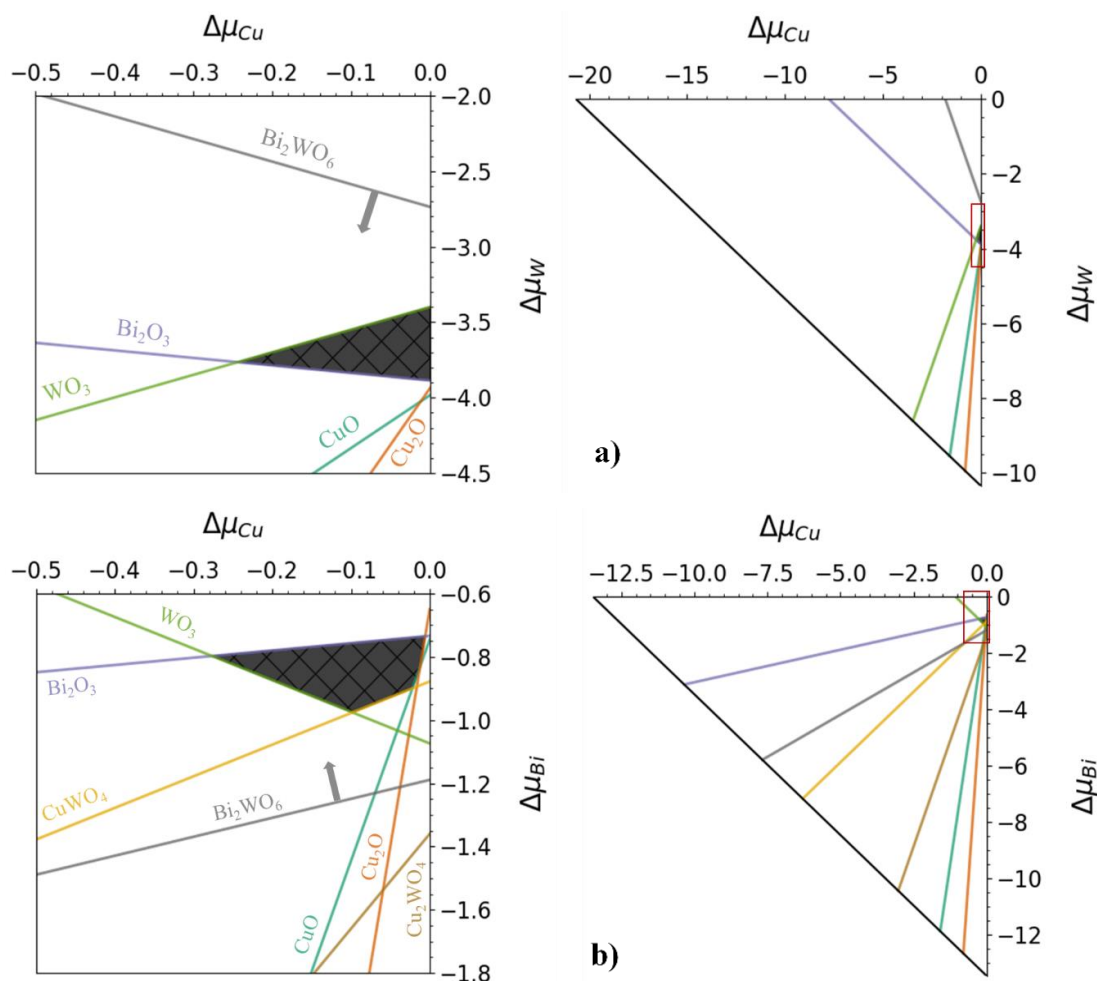

**Figure S6.** Chemical potential landscape for  $\text{CuBiW}_2\text{O}_8$  (CBTO) as a function of constituent chemical potentials (zoomed at left). Outer bounds represent the entire CBTO thermodynamic stability region. With Bi taken as a free variable (a),  $\Delta\mu_{\text{Bi}}$  is set to -0.7 eV. For the case of W as the free variable (b),  $\Delta\mu_{\text{W}}$  is set to -3.96 eV. The shaded region contains points in which all CBTO fragments are thermodynamically unstable, except for  $\text{Bi}_2\text{WO}_6$ , which is thermodynamically stable in the direction indicated by the arrow (zoomed view). All Cu-containing compounds are calculated using DFT+U with  $U_{\text{eff}} = 6$  eV on Cu 3d bands.



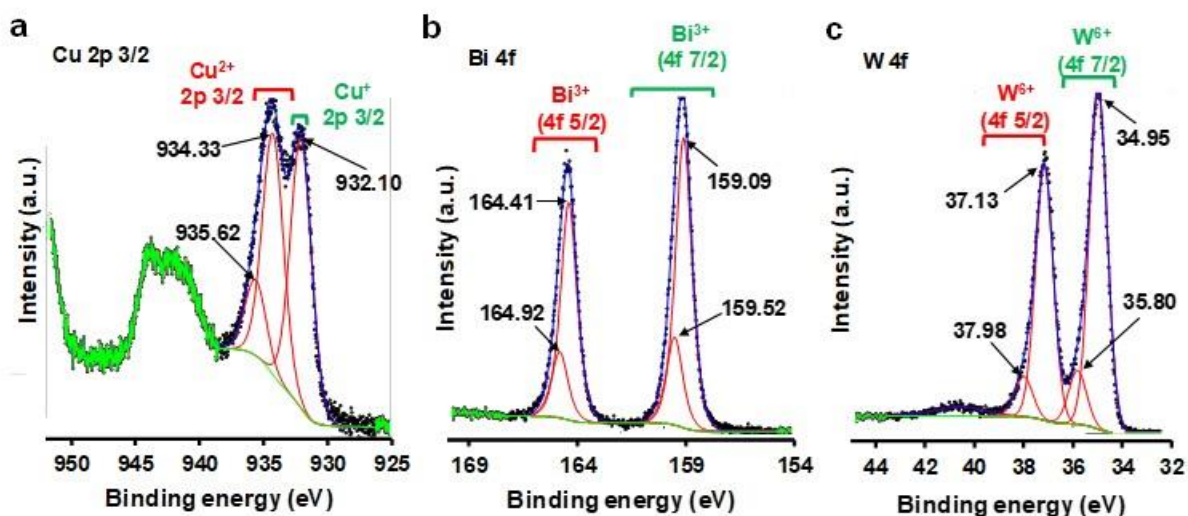

**Figure S7.** X-ray photoelectron spectra of pellet formed by annealing powders 4 times in Cu-rich conditions, followed by pressing and once again annealing in Cu-rich condition. a) Cu 2p XP spectra, b) Bi 4f XP spectra, c) W 4f XP spectra. Red traces correspond the fitted peaks for Cu 2p, Bi 4f and W 4f regions.

Figure S7a reports the XP spectrum of the Cu 2p region, for which prior studies ascribed peaks in the range of 932.7 - 935.7 eV to the Cu 2p 3/2 features from  $\text{Cu}^{2+}$  ions in Cu-oxide compounds and 931.6 - 932.8 eV to the corresponding features from  $\text{Cu}^{1+}$  ions in Cu-oxide compounds.<sup>19-22</sup> We ascribe the fitted peaks at 935.62 eV and 934.33 to  $\text{Cu}^{2+}$ . In addition, the presence of a strong shake-up peak at 940 – 945 eV is also a clear indication of the presence of  $\text{Cu}^{2+}$ .<sup>23</sup> The  $\text{Cu}^{2+}$  signal may come from impurities such as CuO or some other  $\text{Cu}^{2+}$ -oxide. We ascribe the peak at 932.10 eV to  $\text{Cu}^{1+}$ , which may come from CBTO or some other  $\text{Cu}^{1+}$  oxide. For the Bi 4f region in Figure S7b, peaks in the 157.8 - 161.5 eV and peaks in the 163.1 - 166.0 eV range were ascribed to  $\text{Bi}^{3+}$  4f 7/2 and 5/2 features, respectively, from Bi-oxide compounds in prior studies.<sup>24, 25</sup> We ascribe fitted peaks at 164.92 eV, 164.41 eV, 159.52 eV and 159.09 eV to  $\text{Bi}^{3+}$  features, with the two sets of  $\text{Bi}^{3+}$  peaks likely generated by CBTO and  $\text{Bi}_2\text{WO}_6$ . For the W 4f region in Figure S7c, prior studies ascribed peaks in the 34.5 - 36.6 eV and 37.1 - 39.6 eV range to  $\text{W}^{6+}$  4f 7/2 and 5/2 features, respectively, in W-oxide compounds.<sup>26-29</sup> We ascribe the fitted peaks at 37.98 eV, 37.10 eV, 35.80 eV and 34.95 eV to  $\text{W}^{6+}$  features, with the two sets of peaks likely coming from CBTO and  $\text{Bi}_2\text{WO}_6$ .

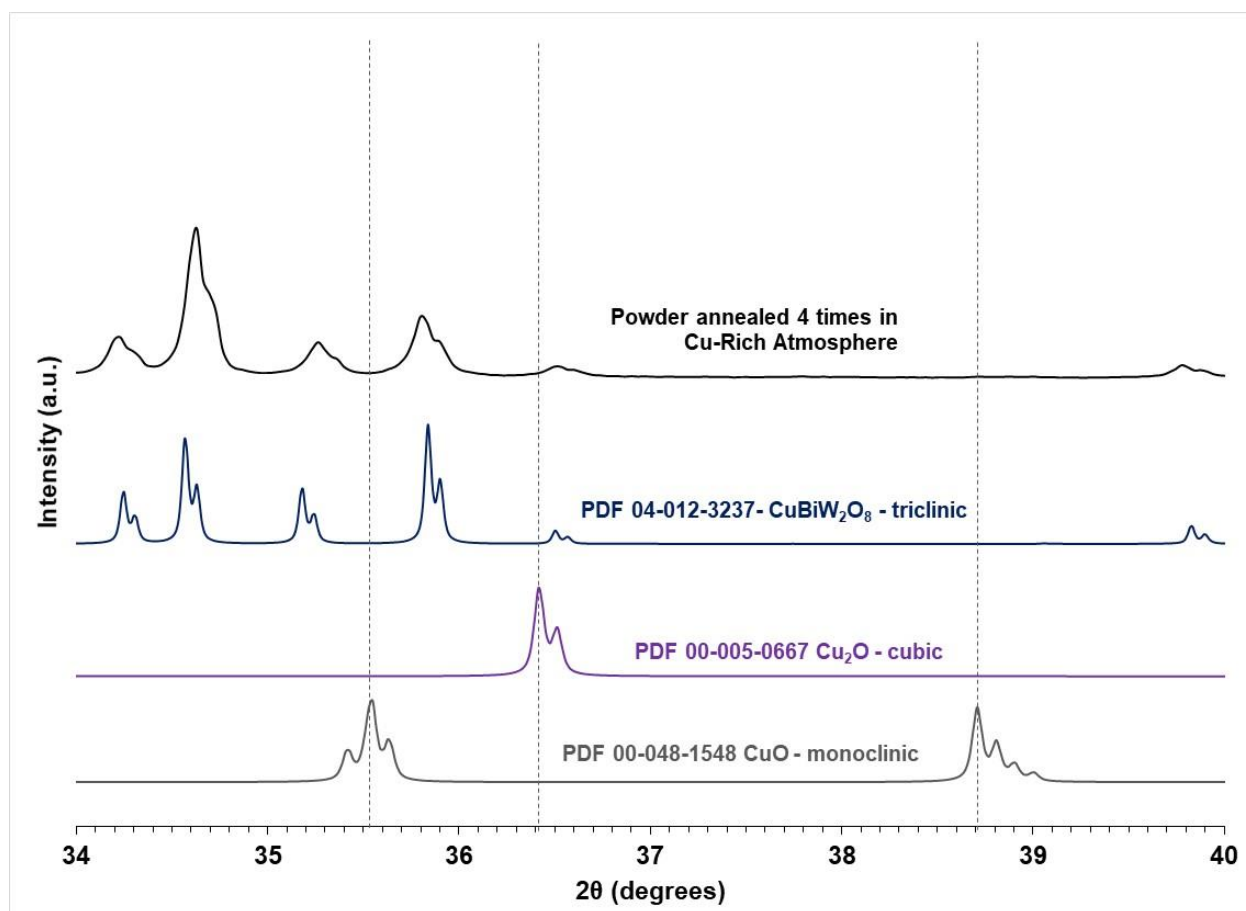

**Figure S8.** XRD pattern of the 4-times Cu-rich annealed powders expanded in the range of angles in which  $\text{CuO}$  and  $\text{Cu}_2\text{O}$  have major peaks.

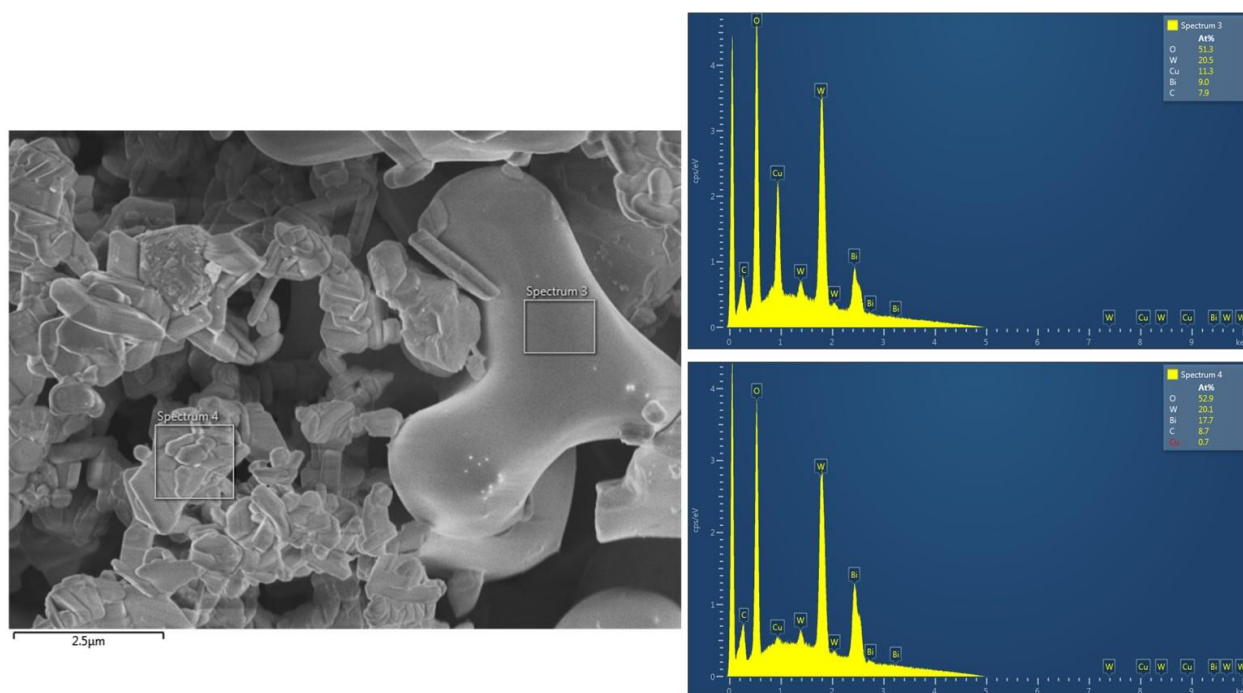

**Figure S9.** EDS of rounded particles (spectrum at top right) and plate-like particles (spectrum at bottom right) in powders annealed 1 time in Cu-rich atmosphere.

|                                           | Cu   | Bi   | W    | O    | C   | Total |
|-------------------------------------------|------|------|------|------|-----|-------|
| Stoichiometric $\text{CuBiW}_2\text{O}_8$ | 8.3  | 8.3  | 16.7 | 66.7 | 0.0 | 100.0 |
| $\text{Bi}_2\text{WO}_6$                  | 0.0  | 22.2 | 11.1 | 66.7 | 0.0 | 100.0 |
| $\text{Bi}_2\text{W}_2\text{O}_9$         | 0.0  | 15.4 | 15.4 | 69.2 | 0.0 | 100.0 |
| Rounded particles                         | 11.3 | 9.0  | 20.5 | 51.3 | 7.9 | 100.0 |
| Plate-like particles                      | 0.7  | 17.7 | 20.1 | 52.9 | 8.7 | 100.1 |
| Rounded particles excl. C                 | 12.3 | 9.8  | 22.3 | 55.7 | 0.0 | 100.0 |
| Plate-like particles excl. C              | 0.8  | 19.4 | 22.0 | 57.9 | 0.0 | 100.1 |

**Table S2.** EDS comparison of atomic percentage of rounded and plate-like particles in powders annealed 1 time in Cu-rich atmosphere.

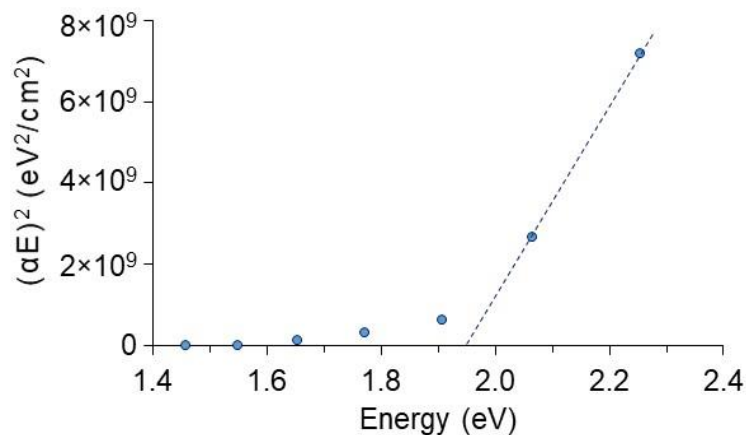

**Figure S10.** Tauc plot of  $(\alpha E)^{1/r}$  vs.  $E$ , where  $E$  is the photon energy and exponent  $r = 0.5$ , calculated from the wavelength-dependent optical absorption of the powders annealed 4 times in Cu-rich atmosphere, dispersed in a solvent, and drop-casted onto quartz substrates.

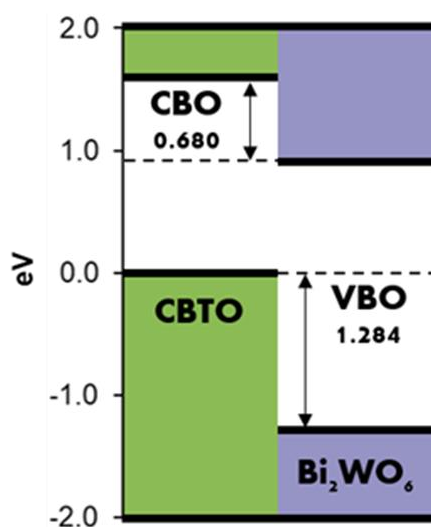

**Figure S11.** DFT calculated valence and conduction band edges of CBTO and  $\text{Bi}_2\text{WO}_6$  aligned with respect to the average of the oxygen 1s core states. Oxygen 1s states for each compound were averaged over all O-sites. CBTO ( $\text{Bi}_2\text{WO}_6$ ) band edges were shifted up (down) due to the difference between the average 1s state and their respective 1s states. CBTO valence band edge is set at 0 eV. Valence/conduction band offsets (VBO/CBO) are shown.

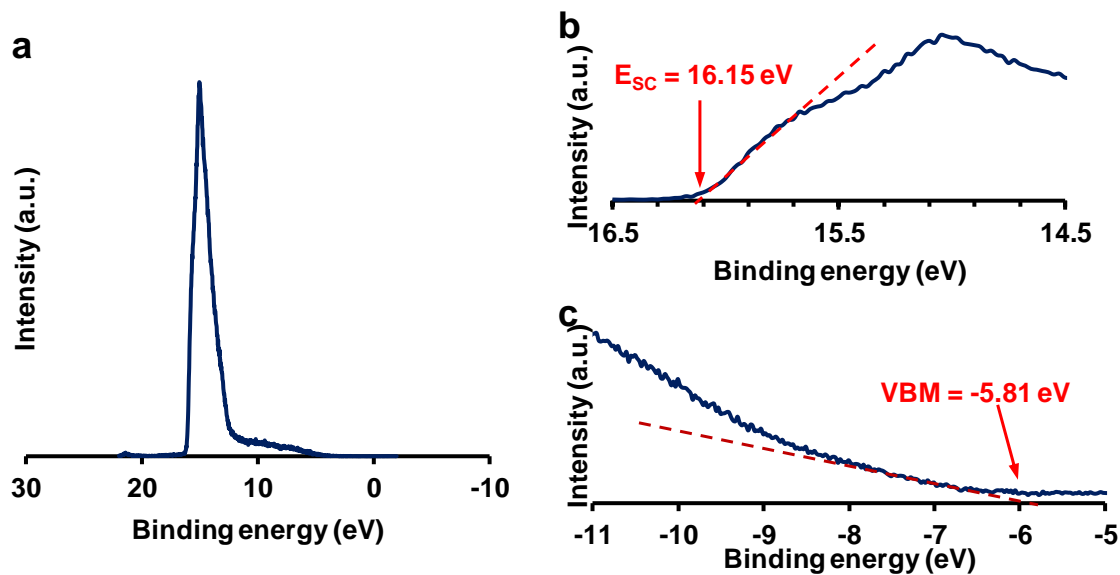

**Figure S12.** a) ultraviolet photoelectron spectroscopy (UPS) spectrum of sintered powder pellet (annealed 4 times in Cu-rich atmosphere and then pelletized), b) close-up of secondary electron cut off region, and c) close-up of valence band region.

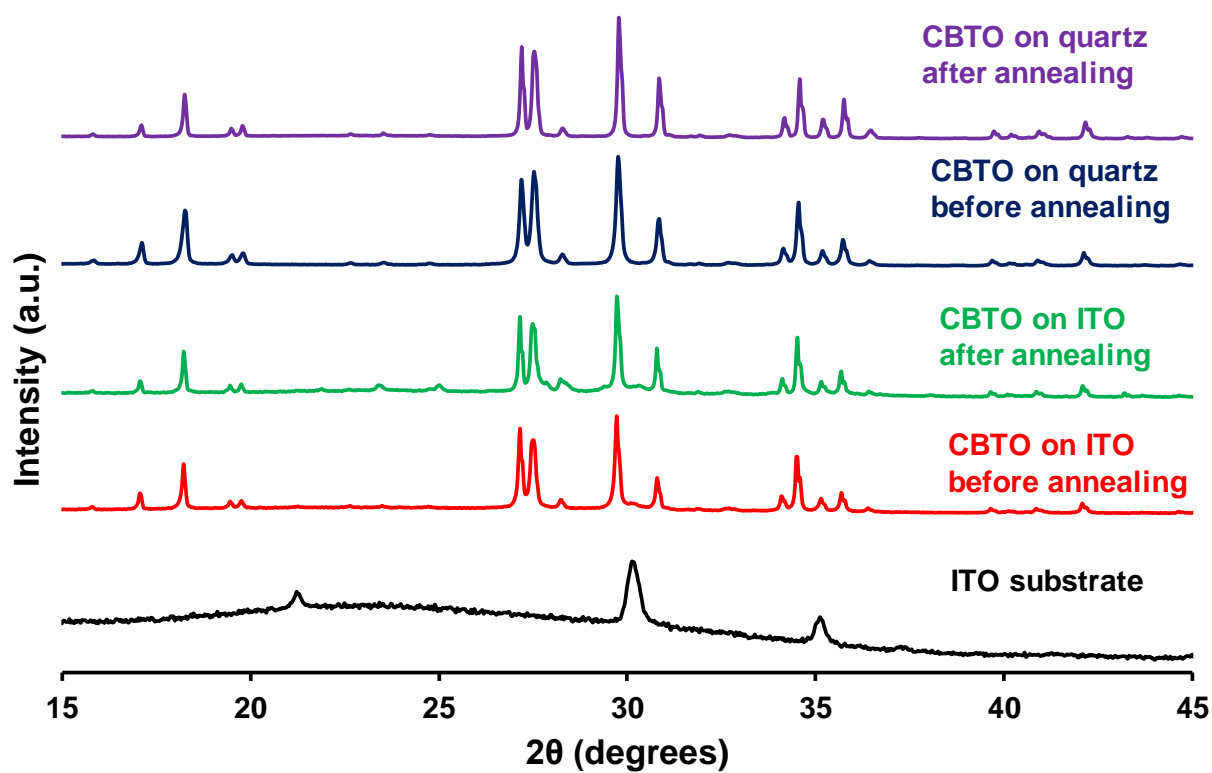

**Figure S13.** X-ray diffraction of ITO substrate (black), CBTO powders on quartz before (red) and after (green) annealing, CBTO powders on ITO before (blue) and after (purple) annealing.

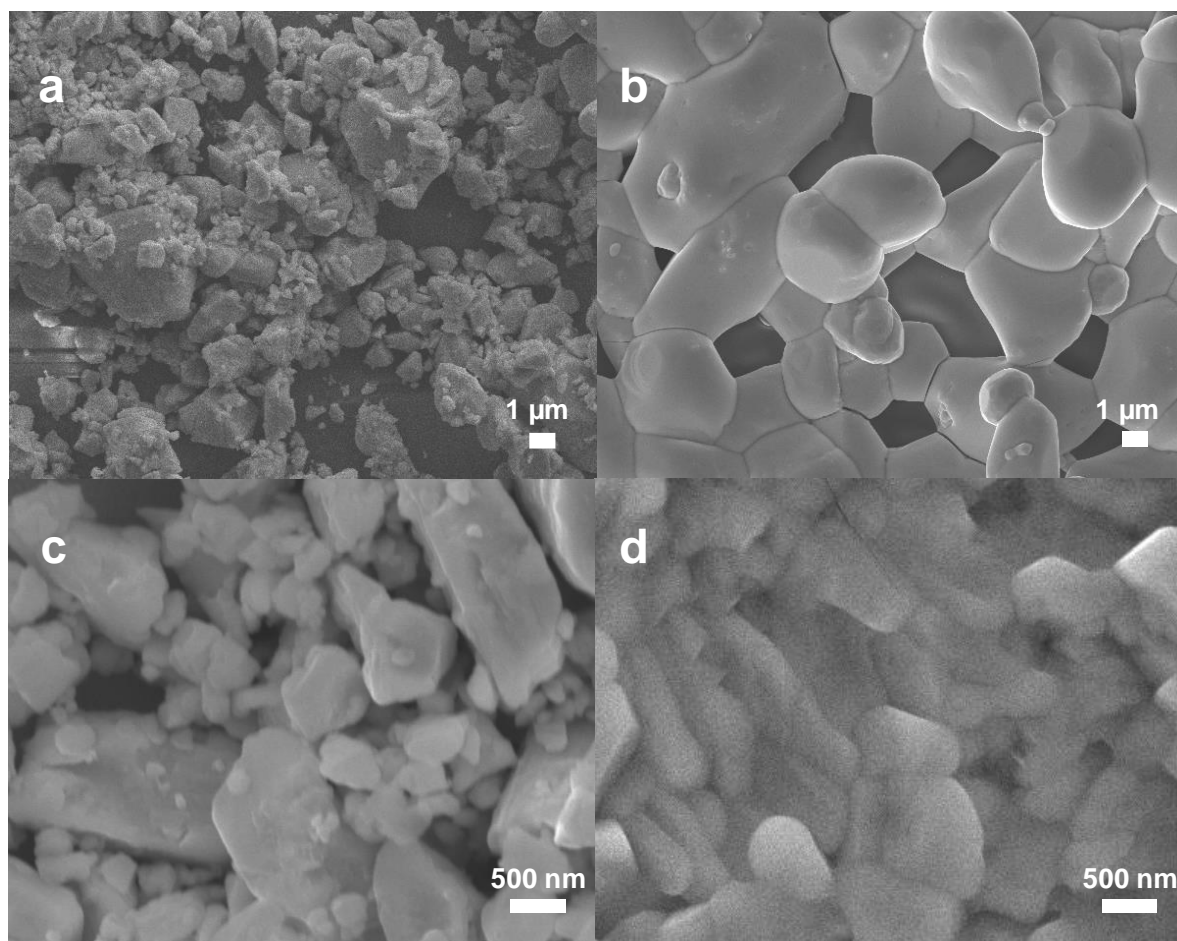

**Figure S14.** Scanning electron microscopy (SEM) top images of CBTO powders on quartz a) before and b) after annealing, and CBTO powders on ITO c) before and d) after annealing.

## References

1. Kresse, G.; Furthmüller, J., Efficient iterative schemes for ab initio total-energy calculations using a plane-wave basis set. *Physical Review B* **1996**, *54* (16), 11169-11186.
2. Kresse, G.; Furthmüller, J., Efficiency of ab-initio total energy calculations for metals and semiconductors using a plane-wave basis set. *Computational Materials Science* **1996**, *6* (1), 15-50.
3. Perdew, J. P.; Chevary, J. A.; Vosko, S. H.; Jackson, K. A.; Pederson, M. R.; Singh, D. J.; Fiolhais, C., Atoms, molecules, solids, and surfaces: Applications of the generalized gradient approximation for exchange and correlation. *Physical Review B* **1992**, *46* (11), 6671-6687.
4. Perdew, J. P.; Burke, K.; Ernzerhof, M., Generalized Gradient Approximation Made Simple. *Physical Review Letters* **1996**, *77* (18), 3865-3868.
5. Kohn, W.; Sham, L. J., Self-Consistent Equations Including Exchange and Correlation Effects. *Physical Review* **1965**, *140* (4A), A1133-A1138.
6. Kresse, G.; Joubert, D., From ultrasoft pseudopotentials to the projector augmented-wave method. *Physical Review B* **1999**, *59* (3), 1758-1775.
7. Blöchl, P. E., Projector augmented-wave method. *Physical Review B* **1994**, *50* (24), 17953-17979.
8. Methfessel, M.; Paxton, A. T., High-precision sampling for Brillouin-zone integration in metals. *Physical Review B* **1989**, *40* (6), 3616-3621.
9. Monkhorst, H. J.; Pack, J. D., Special points for Brillouin-zone integrations. *Physical Review B* **1976**, *13* (12), 5188-5192.
10. Sarker, P.; Prasher, D.; Gaillard, N.; Huda, M. N., Predicting a new photocatalyst and its electronic properties by density functional theory. *Journal of Applied Physics* **2013**, *114* (13), 133508.
11. Anisimov, V. I.; Zaanen, J.; Andersen, O. K., Band theory and Mott insulators: Hubbard U instead of Stoner I. *Physical Review B* **1991**, *44* (3), 943-954.
12. Anisimov, V. I.; Solovyev, I. V.; Korotin, M. A.; Czyżyk, M. T.; Sawatzky, G. A., Density-functional theory and NiO photoemission spectra. *Physical Review B* **1993**, *48* (23), 16929-16934.
13. Solovyev, I. V.; Dederichs, P. H.; Anisimov, V. I., Corrected atomic limit in the local-density approximation and the electronic structure of d impurities in Rb. *Physical Review B* **1994**, *50* (23), 16861-16871.
14. Zhou, F.; Marianetti, C. A.; Cococcioni, M.; Morgan, D.; Ceder, G., Phase separation in  $\text{Li}_x\text{FePO}_4$  induced by correlation effects. *Physical Review B* **2004**, *69* (20), 201101.
15. Ganduglia-Pirovano, M. V.; Hofmann, A.; Sauer, J., Oxygen vacancies in transition metal and rare earth oxides: Current state of understanding and remaining challenges. *Surface Science Reports* **2007**, *62* (6), 219-270.
16. Sarker, P.; Al-Jassim, M. M.; Huda, M. N., Theoretical limits on the stability of single-phase kesterite- $\text{Cu}_2\text{ZnSnS}_4$ . *Journal of Applied Physics* **2015**, *117* (3), 035702.



17. Akkus, H.; Mamedov, A. M., Ab initio calculations of the electronic structure and linear optical properties, including self-energy effects, for paraelectric SbSI. *Journal of Physics: Condensed Matter* **2007**, *19* (11), 116207.
18. Gajdoš, M.; Hummer, K.; Kresse, G.; Furthmüller, J.; Bechstedt, F., Linear optical properties in the projector-augmented wave methodology. *Physical Review B* **2006**, *73* (4), 045112.
19. Haber, J.; Machej, T.; Ungier, L.; Ziolkowski, J., ESCA studies of copper oxides and copper molybdates. *Journal of Solid State Chemistry* **1978**, *25* (3), 207-218.
20. Ghijsen, J.; Tjeng, L. H.; van Elp, J.; Eskes, H.; Westerink, J.; Sawatzky, G. A.; Czyzyk, M. T., Electronic structure of Cu<sub>2</sub>O and CuO. *Physical Review B* **1988**, *38* (16), 11322-11330.
21. Moretti, G.; Fierro, G.; Lo Jacono, M.; Porta, P., Characterization of CuO–ZnO catalysts by X-ray photoelectron spectroscopy: Precursors, calcined and reduced samples. *Surface and Interface Analysis* **1989**, *14* (6-7), 325-336.
22. Sacher, E.; Klemberg-Sapieha, J. E.; Cambron, A.; Okoniewski, A.; Yelon, A., X-ray photoelectron spectroscopic evidence for CuIII in superconducting YBa<sub>2</sub>Cu<sub>3</sub>O<sub>7</sub> ceramic. *Journal of Electron Spectroscopy and Related Phenomena* **1989**, *48* (2), C7-C12.
23. Poulston, S.; Parlett, P. M.; Stone, P.; Bowker, M., Surface Oxidation and Reduction of CuO and Cu<sub>2</sub>O Studied Using XPS and XAES. *Surface and Interface Analysis* **1996**, *24* (12), 811-820.
24. Kazushige, O.; Kenji, Y.; Masatoshi, A.; Yoshiaki, T.; Hisao, H., Bismuth Valence Studies of As-Grown Superconducting Bi-Sr-Ca-Cu-O Thin Films with T<sub>c</sub>(zero) from 98 K to 66 K. *Japanese Journal of Applied Physics* **1992**, *31* (7B), L953.
25. Ismail, F. M.; Hanafi Z, M., Some Physico-Chemical Properties of Bismuth Chalcogenides x-Ray Photoelectron and Diffuse Reflectance Spectra. In *Zeitschrift für Physikalische Chemie*, 1986; Vol. 267O, p 667.
26. Shi, J.; Allara, D. L., Characterization of High-Temperature Reactions at the BaO/W Interface. *Langmuir* **1996**, *12* (21), 5099-5108.
27. McGuire, G. E.; Schweitzer, G. K.; Carlson, T. A., Core electron binding energies in some Group IIIA, VB, and VIB compounds. *Inorganic Chemistry* **1973**, *12* (10), 2450-2453.
28. Chowdari, B. V. R.; Tan, K. L.; Chia, W. T., Raman and X-ray photoelectron spectroscopic studies of lithium phosphotungstate glasses. *Solid State Ionics* **1992**, *53-56*, 1172-1178.
29. Halada, G. P.; Clayton, C. R., Comparison of Mo–N and W–N synergism during passivation of stainless steel through x-ray photoelectron spectroscopy and electrochemical analysis. *Journal of Vacuum Science & Technology A* **1993**, *11* (4), 2342-2347.
